# Supplementary material for: The Effects of Physical Activity on Cancer Patients Undergoing Treatment with Immune Checkpoint Inhibitors: A Scoping Review
Source: MDPI journal article supplement (doi:10.3390/cancers13246364), 2021-12-18
Supplement: s1 [file s1]

**Inclusion Assessment Form**  
Physical activity and immune checkpoint inhibitor (ICI) treatment

Reviewer: \_\_\_\_\_ Date: \_\_\_\_\_

Reference: \_\_\_\_\_

Instructions: Complete the form on each study. If the final decision is “no”, exclude that study.

**CRITERIA**

|                       |                                                                                             |  | Yes | No  | Unsure |
|-----------------------|---------------------------------------------------------------------------------------------|--|-----|-----|--------|
| 1. Study Publication  |                                                                                             |  |     |     |        |
|                       | Is the study a full manuscript?                                                             |  | [ ] | [ ] | [ ]    |
|                       | Is the study an abstract only?                                                              |  | [ ] | [ ] | [ ]    |
|                       | Was the study published between January 2010 and August 2021?                               |  | [ ] | [ ] | [ ]    |
|                       | Was the study published in English?                                                         |  | [ ] | [ ] | [ ]    |
| 2. Study Population   |                                                                                             |  |     |     |        |
|                       | Did the study include patients aged 18 and over?                                            |  | [ ] | [ ] | [ ]    |
|                       | Were patients receiving treatment with an ICI <sup>#</sup> for an FDA-approved condition*?  |  | [ ] | [ ] | [ ]    |
| 3. Study Intervention |                                                                                             |  |     |     |        |
|                       | Did the study include some form of physical activity/exercise^ concurrent with ICI therapy? |  | [ ] | [ ] | [ ]    |
| 4. Study Outcomes     |                                                                                             |  |     |     |        |
|                       | Did the study report on one or more outcomes?                                               |  | [ ] | [ ] | [ ]    |

**DECISION OF REVIEWER**

|                                                        | Yes | No  | Unsure |
|--------------------------------------------------------|-----|-----|--------|
| 1. Is this study potentially relevant for this review? | [ ] | [ ] | [ ]    |

**CONSENSUS**

Second review

[ ] Include

[ ] Exclude

[ ] Disagree

Final consensus

[ ] Include

[ ] Exclude

[ ] Disagree

**# ICIs of interest**

Keytruda (pembrolizumab)  
Opdivo (nivolumab)  
Libtayo (cemiplimab)  
Tecentriq (atezolizumab)  
Bavencio (avelumab)  
Imfinzi (durvalumab)  
Yervoy (ipilimumab)

**\*List of approved cancerous indications as of December 2020**

Pleural mesothelioma  
Triple-negative breast cancer  
Bacillus Calmette-Guérin bladder cancer  
Cervical cancer  
Classical Hodgkin's lymphoma  
Colorectal cancer  
Cutaneous squamous cell carcinoma  
Endometrial carcinoma  
Esophageal squamous cell carcinoma  
Gastric cancer  
Hepatocellular carcinoma  
Head and neck squamous cell carcinoma  
Merkel cell carcinoma  
Non-small cell lung cancer  
Primary mediastinal large B cell lymphoma  
Renal cell carcinoma  
Small cell lung cancer  
Urothelial carcinoma

**^ Consider a very broad definition of physical activity, including:**

exercise OR "exercise therapy" OR "physical activity" OR "weight-bearing exercise" OR  
"weight-bearing" OR "weight-bearing training" OR "strength training" OR training OR aerobic  
OR "aerobic training" OR "aerobic exercise" OR "aerobic activity" OR rehabilitation OR  
"physical rehabilitation" OR "HIIT" OR "high intensity interval training" OR "therapeutic  
exercise" OR "aerobic conditioning" OR "rehabilitative exercise" OR physiotherapy OR  
"resistance training", etc

**Extraction/Charting Form**

| Author(s)* | Country | Study type | Population | ICI | Exercise | Objective/Outcomes | Summary |
|------------|---------|------------|------------|-----|----------|--------------------|---------|
|            |         |            |            |     |          |                    |         |
|            |         |            |            |     |          |                    |         |
|            |         |            |            |     |          |                    |         |

\* Include year, title, etc.
